# Supplementary material
Source: PubMed Central journal article supplement (PMC8489562)
Supplement: HUMREP_35_2_453_s1.pdf [file HUMREP_35_2_453_s1.pdf]

**Supplementary Table S1** Multivariable<sup>1</sup> HR and 95% CIs for uterine leiomyomas according to dairy intake stratified by parity<sup>2</sup> in the Nurses' Health Study II, 1991–2009.

|                          | Nulliparous |             |              | Parous |             |              |
|--------------------------|-------------|-------------|--------------|--------|-------------|--------------|
|                          | Cases       | HR (95% CI) |              | Cases  | HR (95% CI) |              |
| <b>Total Dairy</b>       |             |             |              |        |             |              |
| ≤4/week                  | 55          | 1.11        | (0.84, 1.47) | 113    | 1.06        | (0.88, 1.29) |
| 5–6/week                 | 111         | 0.94        | (0.77, 1.15) | 311    | 1.07        | (0.94, 1.20) |
| 1/day                    | 97          | 0.89        | (0.72, 1.10) | 253    | 0.89        | (0.78, 1.02) |
| 2/day                    | 739         | 1.00        | Referent     | 1967   | 1.00        | Referent     |
| 3/day                    | 472         | 0.86        | (0.76, 0.96) | 1667   | 0.99        | (0.93, 1.06) |
| 4/day                    | 328         | 1.03        | (0.90, 1.18) | 1140   | 0.99        | (0.92, 1.07) |
| >4/day                   | 222         | 1.02        | (0.88, 1.19) | 667    | 0.90        | (0.81, 0.98) |
| $P_{\text{trend}}^3$     |             |             | 0.47         |        |             | 0.06         |
| <b>Low Fat Dairy</b>     |             |             |              |        |             |              |
| ≤4/week                  | 380         | 0.97        | (0.86, 1.11) | 1056   | 1.02        | (0.94, 1.10) |
| 5–6/week                 | 374         | 1.01        | (0.89, 1.15) | 1032   | 1.03        | (0.95, 1.11) |
| 1/day                    | 233         | 1.05        | (0.89, 1.22) | 655    | 1.06        | (0.97, 1.16) |
| 2/day                    | 650         | 1.00        | Referent     | 1979   | 1.00        | Referent     |
| 3/day                    | 288         | 1.02        | (0.89, 1.17) | 1030   | 0.95        | (0.88, 1.02) |
| >3/day                   | 99          | 0.93        | (0.75, 1.15) | 366    | 0.95        | (0.88, 1.02) |
| $P_{\text{trend}}^3$     |             |             | 0.96         |        |             | 0.04         |
| <b>High Fat Dairy</b>    |             |             |              |        |             |              |
| ≤4/week                  | 505         | 1.09        | (0.96, 1.24) | 1203   | 0.95        | (0.88, 1.03) |
| 5–6/week                 | 478         | 0.92        | (0.81, 1.04) | 1586   | 0.92        | (0.86, 0.99) |
| 1/day                    | 263         | 1.09        | (0.94, 1.27) | 777    | 0.92        | (0.85, 1.00) |
| 2/day                    | 514         | 1.00        | Referent     | 1818   | 1.00        | Referent     |
| 3/day                    | 159         | 1.11        | (0.93, 1.33) | 486    | 0.98        | (0.89, 1.08) |
| >3/day                   | 105         | 1.13        | (0.91, 1.39) | 248    | 0.86        | (0.75, 0.98) |
| $P_{\text{trend}}^3$     |             |             | 0.44         |        |             | 0.97         |
| <b>All Milk</b>          |             |             |              |        |             |              |
| ≤4/week                  | 725         | 1.00        | Referent     | 1869   | 1.00        | Referent     |
| 5–6/week                 | 402         | 1.04        | (0.92, 1.17) | 1130   | 1.00        | (0.93, 1.08) |
| 1/day                    | 294         | 0.98        | (0.85, 1.12) | 881    | 0.95        | (0.88, 1.03) |
| 2/day                    | 349         | 1.04        | (0.92, 1.19) | 1298   | 1.00        | (0.93, 1.08) |
| >2/day                   | 254         | 1.10        | (0.95, 1.28) | 940    | 0.91        | (0.84, 0.98) |
| $P_{\text{trend}}^3$     |             |             | 0.18         |        |             | 0.04         |
| <b>Skim/low-fat milk</b> |             |             |              |        |             |              |
| ≤4/week                  | 807         | 1.00        | Referent     | 2057   | 1.00        | Referent     |
| 5–6/week                 | 366         | 0.98        | (0.87, 1.11) | 1095   | 1.01        | (0.94, 1.09) |
| 1/day                    | 305         | 0.99        | (0.86, 1.13) | 880    | 0.96        | (0.88, 1.03) |
| 2/day                    | 310         | 1.04        | (0.91, 1.19) | 1207   | 1.02        | (0.94, 1.09) |
| >2/day                   | 236         | 1.08        | (0.93, 1.25) | 879    | 0.91        | (0.83, 0.98) |
| $P_{\text{trend}}^3$     |             |             | 0.24         |        |             | 0.05         |

Continued

**Supplementary Table SI Continued.**

|                      | Nulliparous |             |              | Parous |             |              |
|----------------------|-------------|-------------|--------------|--------|-------------|--------------|
|                      | Cases       | HR (95% CI) |              | Cases  | HR (95% CI) |              |
| <b>Whole milk</b>    |             |             |              |        |             |              |
| <=4/week             | 1971        | 1.00        | Referent     | 5939   | 1.00        | Referent     |
| 5-6/week             | 24          | 0.92        | (0.61, 1.38) | 87     | 0.98        | (0.79, 1.21) |
| 1/day                | 16          | 1.16        | (0.71, 1.90) | 48     | 1.04        | (0.78, 1.38) |
| >1/day               | 13          | 1.02        | (0.59, 1.76) | 44     | 1.02        | (0.63, 1.15) |
| $P_{\text{trend}}^3$ |             |             | 0.87         |        |             | 0.40         |
| <b>Ice Cream</b>     |             |             |              |        |             |              |
| <=4/week             | 1983        | 1.00        | Referent     | 5974   | 1.00        | Referent     |
| 5-6/week             | 31          | 0.99        | (0.69, 1.42) | 112    | 0.91        | (0.75, 1.10) |
| 1+/day               | 10          | 1.06        | (0.57, 1.99) | 32     | 0.97        | (0.69, 1.38) |
| $P_{\text{trend}}^3$ |             |             | 0.78         |        |             | 0.47         |
| <b>Yogurt</b>        |             |             |              |        |             |              |
| <=4/week             | 1805        | 1.00        | Referent     | 5638   | 1.00        | Referent     |
| 5-6/week             | 173         | 1.01        | (0.86, 1.18) | 374    | 0.89        | (0.80, 0.98) |
| 1+/day               | 46          | 0.79        | (0.59, 1.06) | 106    | 0.98        | (0.80, 1.18) |
| $P_{\text{trend}}^3$ |             |             | 0.20         |        |             | 0.09         |
| <b>Cheese</b>        |             |             |              |        |             |              |
| <=4/week             | 960         | 1.00        | Referent     | 2564   | 1.00        | Referent     |
| 5-6/week             | 669         | 1.02        | (0.93, 1.13) | 2214   | 1.02        | (0.96, 1.08) |
| 1/day                | 186         | 0.94        | (0.80, 1.10) | 641    | 0.97        | (0.89, 1.06) |
| 2/day                | 175         | 0.91        | (0.77, 1.07) | 635    | 1.01        | (0.92, 1.10) |
| >2/day               | 34          | 1.05        | (0.74, 1.48) | 64     | 0.94        | (0.73, 1.20) |
| $P_{\text{trend}}^3$ |             |             | 0.54         |        |             | 0.72         |

HR, hazard ratio; MV, multivariable

<sup>1</sup>Adjusted for age (continuous), total calories (continuous), age at menarche (<11, 11, 12, 13, 14-15, >15 years), infertility (yes, no), ancestry (Caucasian, Black, Hispanic, Asian, other), number of births among parous women (1, 2, 3, 4+), age at first birth (<25, 25-30, >30 years), time since last birth (<1, 1-3, 4-5, 6-7, 8-9, 10-12, 13-15, 16+ years), age first oral contraceptive (OC) use (13-16, 17-20, 21-24, 25+ years), BMI (<20, 20-21.9, 22-23.9, 24-24.9, 25-26.9, 27-29.9, 30+ kg/m<sup>2</sup>), menstrual cycle length (<26, 26-31, 32-50 and >50 days), smoking (never, past, current), recent gynecologic/breast exam (no recent exam, recent exam) and use of anti-hypertensive medications/diastolic blood pressure (no meds <65, no meds 65-74, no meds 75-84, no meds 85-89, no meds 90+, meds <65, meds 65-74, meds 75-84, meds 85-89, meds 90+).

<sup>2</sup>P-values for interaction were 0.14 for total dairy, 0.34 for low-fat dairy and 0.42 for high-fat dairy

<sup>3</sup>Determined using category medians.
